# Supplementary material for: Qualitative interview with mothers of moderately or late preterm infants in the UK: where are the care gaps?
Source: HighWire-hosted journal article supplement (doi:10.1136/bmjopen-2023-076057), 2024-07-01
Supplement: bmjopen-2023-076057supp002_data_supplement.pdf [file bmjopen-2023-076057supp002_data_supplement.pdf]

**Supplementary Material 2: Semi-structured Interview Schedule**

- Can you tell me a little bit about \_\_\_\_\_?
- If you feel comfortable, can you tell me a little bit about the birth?
- Can you tell me about your experience of the care you received at birth and immediately after your baby was born?
- What sort of information about preterm birth was given to you by professionals or clinical staff?
- Do you feel you had enough help and support after \_\_\_\_\_ was born?
  
- Can you tell me about taking \_\_\_\_\_ home for the first time?
- Do you feel your experience is different to other parents you might know?
- How did you feel at their two year development check?
- Can you think of any support networks around this time that particularly helped (perhaps friends / family / groups?).
  
- Does \_\_\_\_\_ attend nursery?
- Do you have any worries about your child's development?
- How do you feel about \_\_\_\_\_ starting school?
- What are some of the strengths of \_\_\_\_\_?
  
- Can you sum up your experiences of having a prematurely born infant
- Do you think there is anything important you would like to say and I have not asked you about?
